# Supplementary material for: Common functional polymorphism within miR-146a and miR-196a-2 as susceptibility loci for hepatocellular carcinoma: An updated meta-analysis
Source: PubMed Central journal article supplement — Meta Gene. 2015 Nov 15;7:40–7. doi: 10.1016/j.mgene.2015.11.002 (PMC4707244; doi:10.1016/j.mgene.2015.11.002), 2015-11-15

Figure S1: Galbraith plots for miR-146a rs2910164 polymorphism and HCC risk. A) model (G vs C), B) model (GG vs CC), C) model(GG vs CG+CC)

A

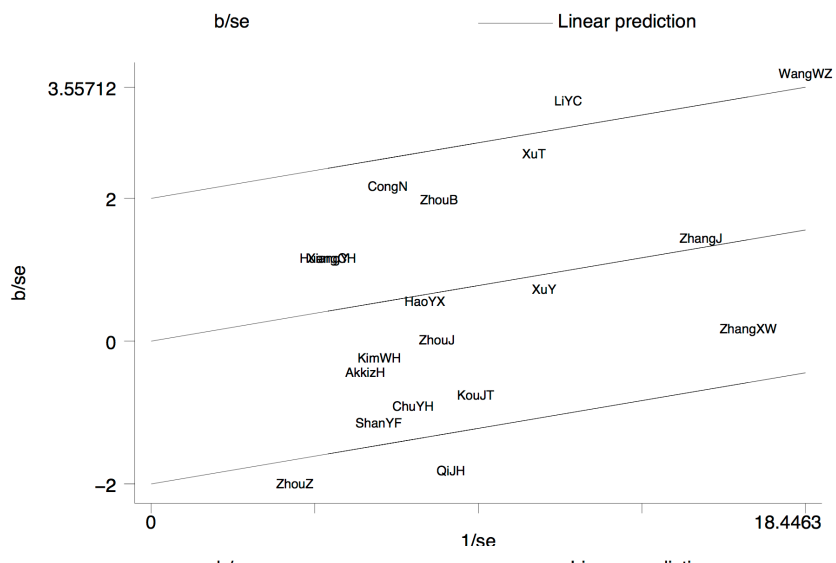

B

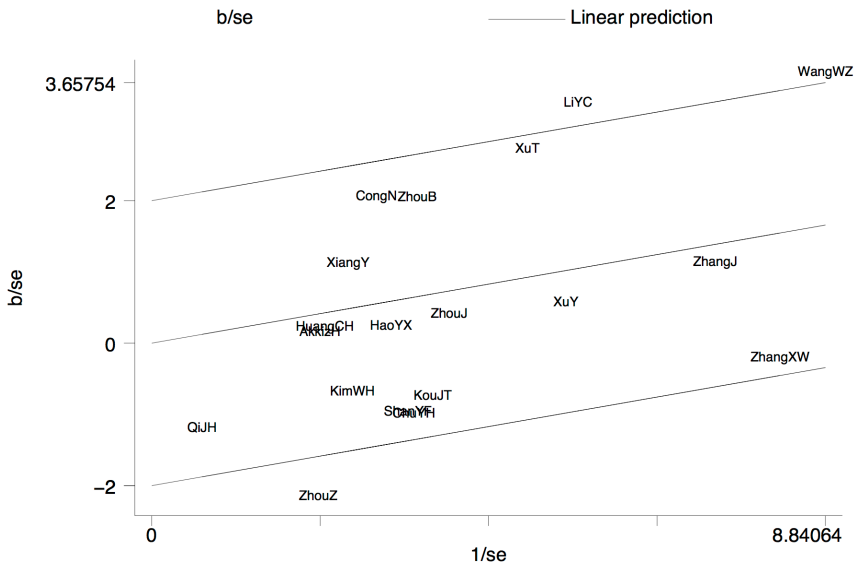

C

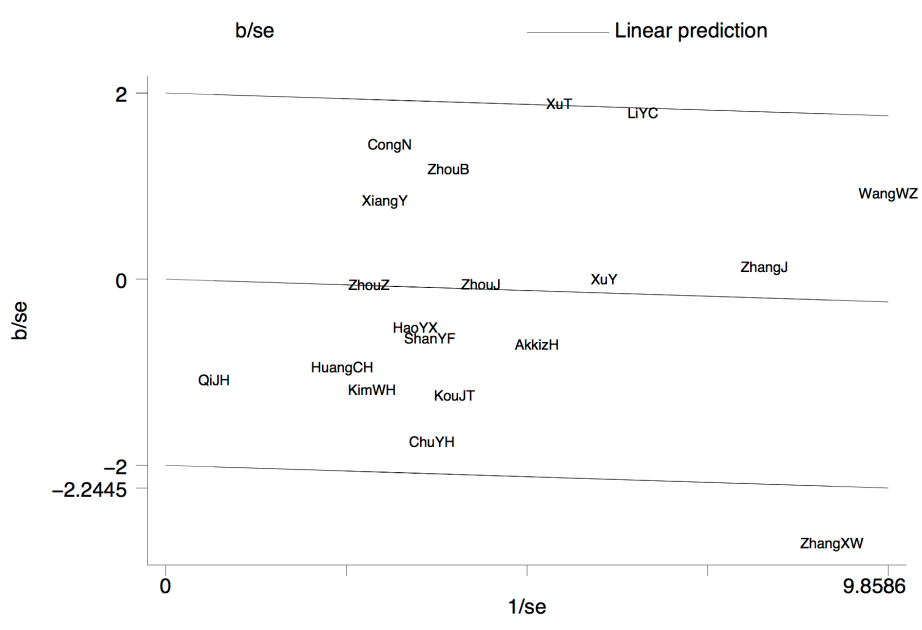

Figure S2: Galbraith plots for miR-196a2 rs11614913 polymorphism and HCC risk. A) model (C vs T), B) model (CC vs TT), C) model (TC vs TT), D) model (CC+TC vs TT), E) model (CC vs TC+TT)

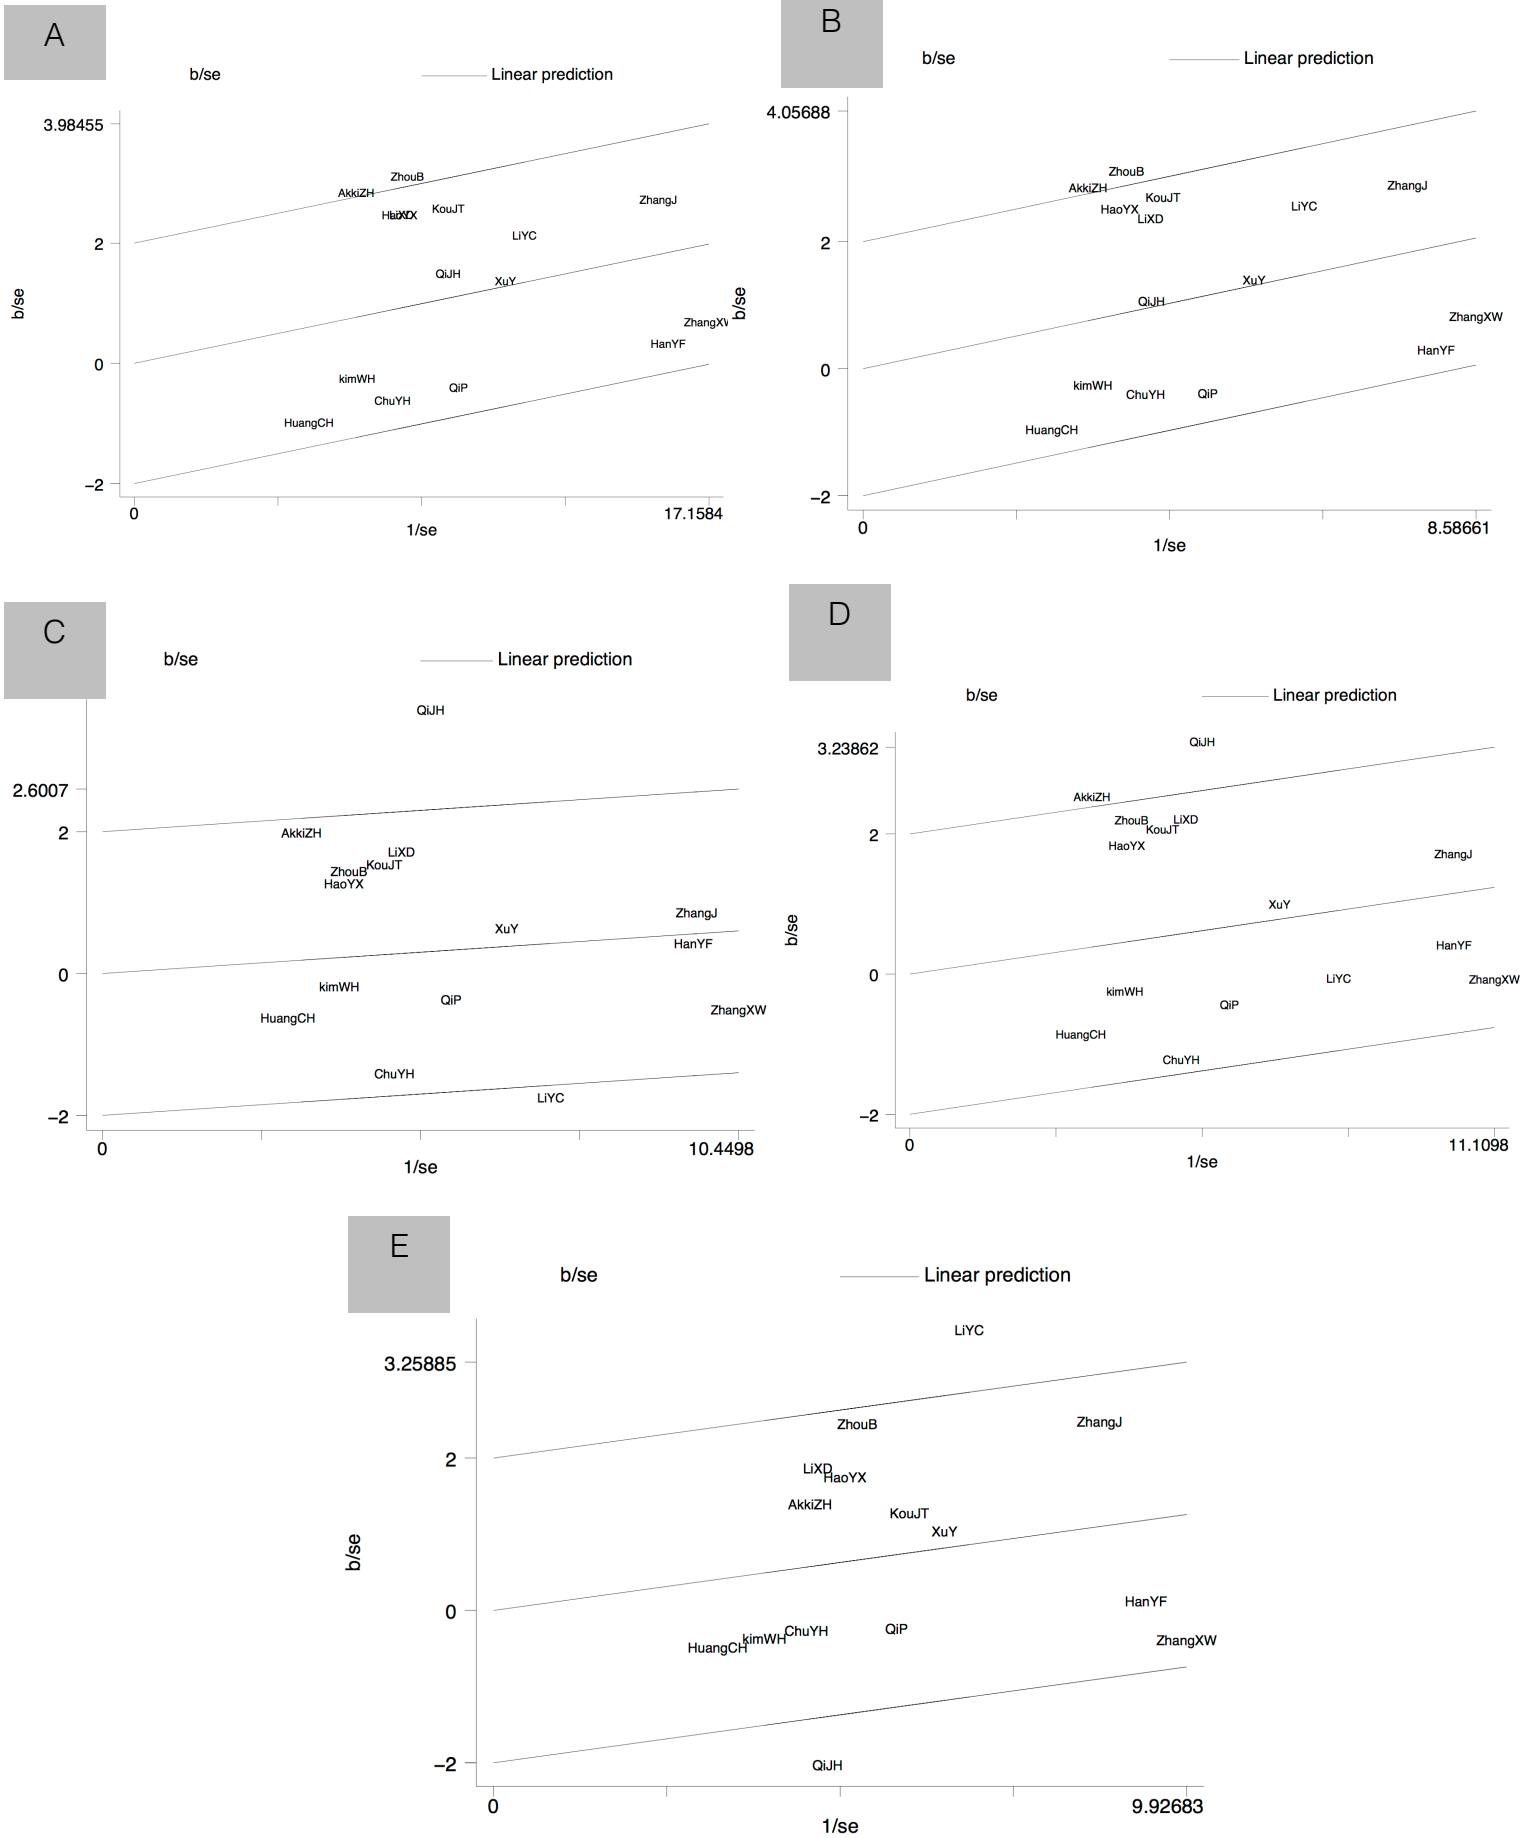

Supplement: mmc1.pdf [file mmc1.pdf]
